# Supplementary figures and images for: Ferroptosis Induction and YAP Inhibition as New Therapeutic Targets in Gastrointestinal Stromal Tumors (GISTs)
Source: MDPI journal article supplement (doi:10.3390/cancers14205050), 2022-10-15

Western Blots : GPX4

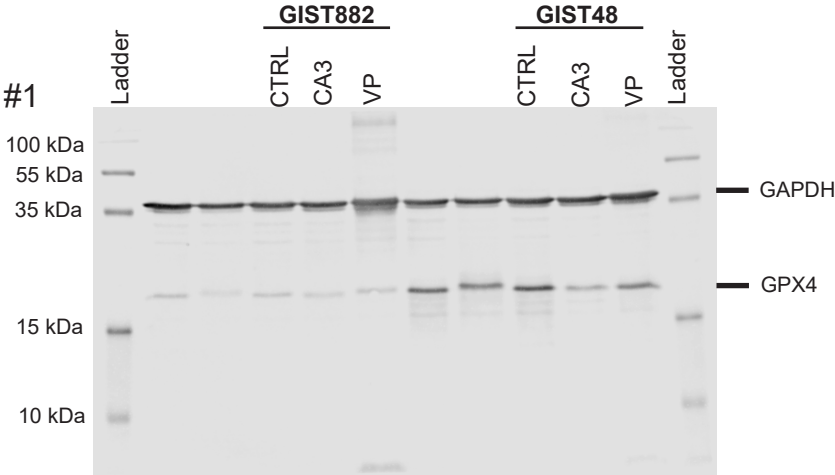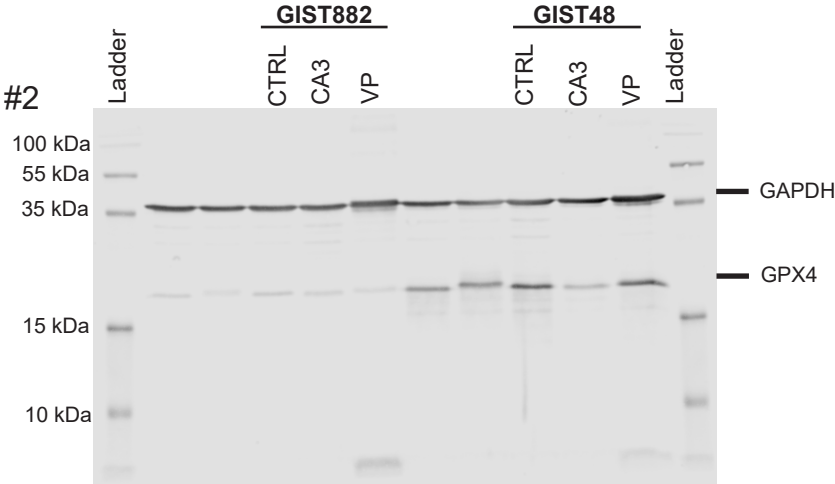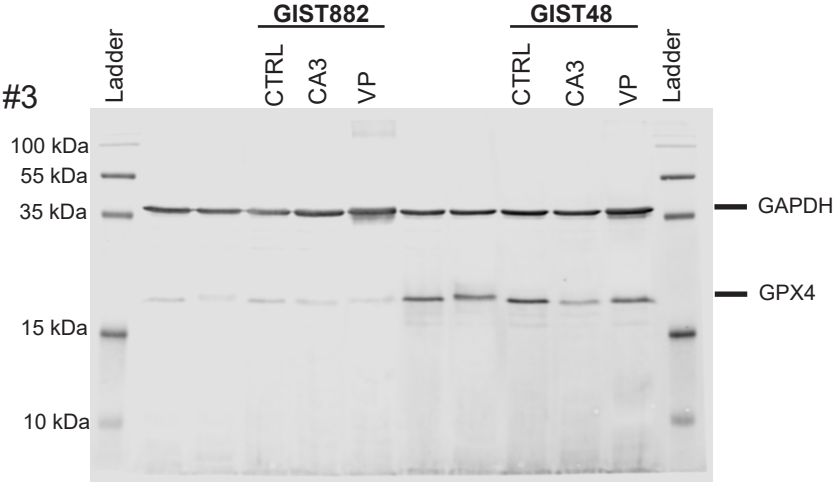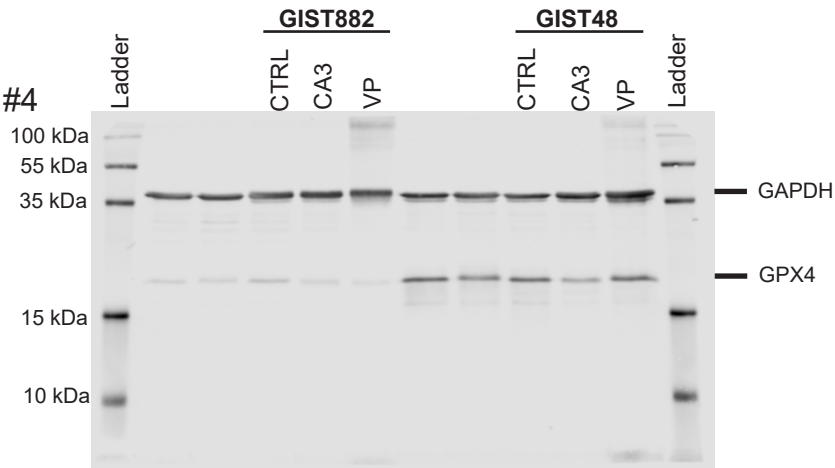

Western Blots : SLC7A11

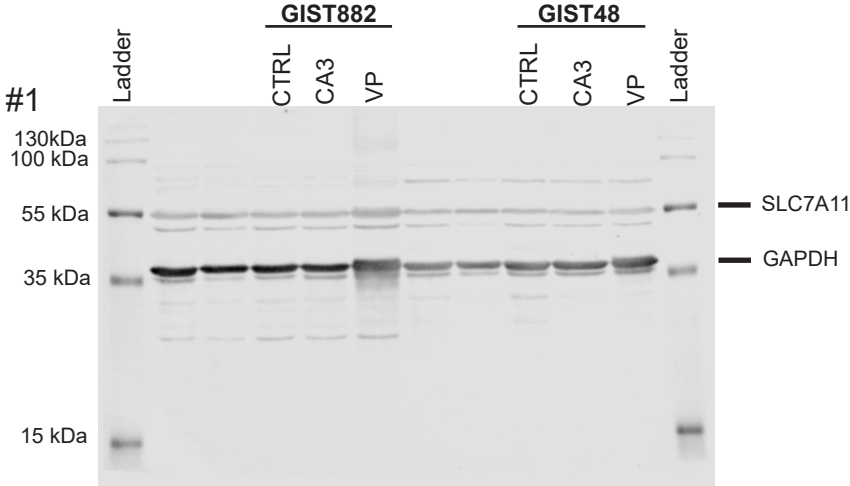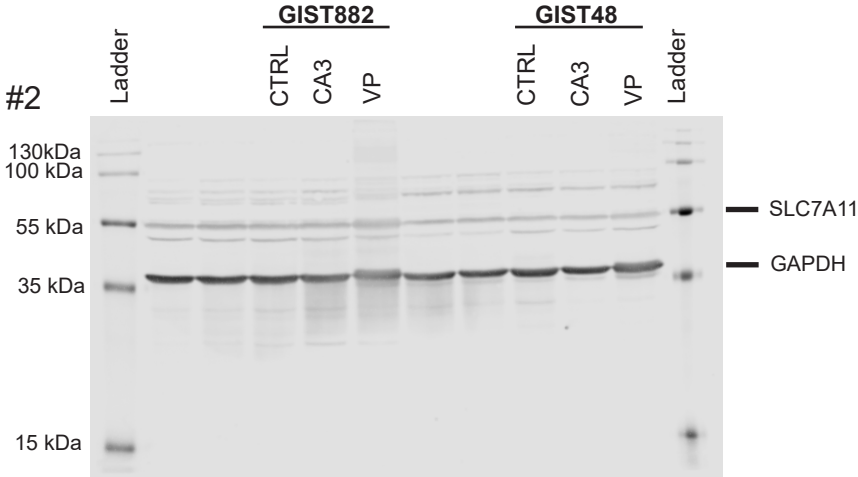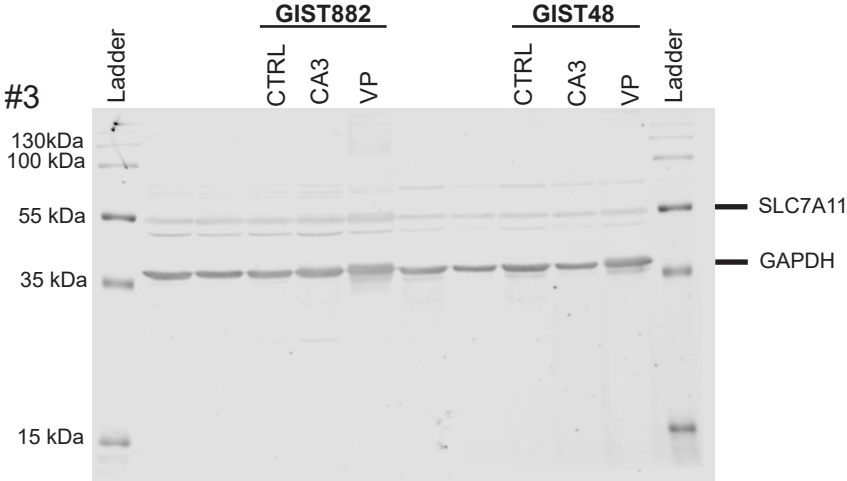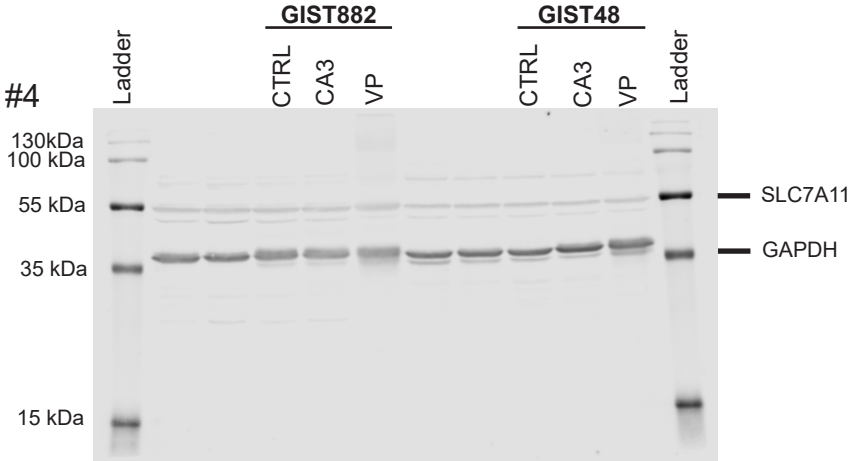

Supplement: s1 [file s1]
